# Supplementary material for: Novel networked wicker-like PtFe nanowires with branch-rich exteriors for efficient electrocatalysis
Source: Royal Society of Chemistry journal article supplement (doi:10.1039/c9nr05325e), 2019-01-01
Supplement: c9nr05325e1.pdf [file c9nr05325e1.pdf]

## *Supporting Information for*

# **Novel Networked Wicker-like PtFe Nanowires with Branch-rich Exteriors for Efficient Electrocatalysis**

Yangping Zhang,<sup>‡</sup> Fei Gao,<sup>‡</sup> Tongxin Song, Cheng Wang, Chunyan Chen, and  
Yukou Du\*

<sup>a</sup> *College of Chemistry, Chemical Engineering and Materials Science, Soochow University,*

*Suzhou 215123, P.R. China.*

*\* Corresponding author: E-mail: duyk@suda.edu.cn (Y. Du)*

*Yangping Zhang and Fei Gao contributed equally to this manuscript.*

## **1. Experimental Section**

### **1.1 Materials and reagents**

Platinum(II) acetylacetonate (Pt(acac)<sub>2</sub>, 97%), and iron(II) acetate (Fe(Ac)<sub>2</sub>, reagent grade, 95%) were purchased from Shanghai Macklin Biochemical Co. Ltd. Oleylamine (OAm, 90%), N-Hexadecyltrimethylammonium Chloride (CH<sub>3</sub>(CH<sub>2</sub>)<sub>15</sub>N(Cl)(CH<sub>3</sub>)<sub>3</sub>, CTAC, >97.0%), Phloroglucinol anhydrous (C<sub>6</sub>H<sub>6</sub>O<sub>3</sub>, ≥99%), Tungsten carbonyl (W(CO)<sub>6</sub>, 98%) were bought from Aladdin Co. Ltd. Methanol (CH<sub>3</sub>OH, A.R. 99%), ethanol (CH<sub>3</sub>CH<sub>2</sub>OH, A.R. grade, 99.7%), cyclohexane (C<sub>6</sub>H<sub>12</sub>, A.R. grade, 98%) were all purchased from Sinopharm Chemical Reagent Co. Ltd. (Shanghai, China). Water (H<sub>2</sub>O, 18 MΩ/cm) used in all experiments was prepared by passing through an ultra-pure purification system.

### **1.2 Preparation of PtFe NWs.**

In the typical preparation of Pt<sub>3</sub>Fe NWs, Pt(acac)<sub>2</sub> (10 mg), Fe (Ac)<sub>2</sub> (1.4 mg), W(CO)<sub>6</sub> (5 mg), phloroglucinol anhydrous (10 mg), CTAC (32 mg), and 5 mL OAm were dissolved into a glass vial (volume: 20 mL). After capping the vial, the mixture was kept for 1 h under ultrasound condition. Subsequently, the resulting homogeneous mixture was then heated from ambient temperature to 180 °C and maintained at 180 °C for 9 h in an oil bath. The products were collected by centrifugation and washed three

times with a cyclohexane/ethanol mixture. The obtained catalyst was denoted as Pt<sub>3</sub>Fe NWs. By changing the amount of metal precursor Fe (Ac)<sub>2</sub> to 2.2 mg and 1.1 mg, Pt<sub>4</sub>Fe NWs and Pt<sub>2</sub>Fe NWs were synthesized while keeping other reaction conditions same.

### 1.3 Characterizations

In physical characterizations, transmission electron microscope (TEM, accelerating voltage: 120 kV, HT-7700) was conducted to analyze the micromorphology of as-obtained catalysts. High resolution TEM (HRTEM, operation voltage: 200 kV, F20) technique was employed to investigate the crystal structure. The composition of catalysts was obtained by scanning electron microscope energy-dispersive X-ray spectroscopy (SEM-EDS, HITACHI S-4700, operate voltage: 15 kV). X-ray diffraction (XRD, Netherlands PANalytical) analysis was conducted on X'Pert-Pro MPD diffractometer. Furthermore, the elemental states were analyzed by X-ray photoelectron spectroscopy (XPS), which conducted on a VG Scientific ESCALab 220 XL electron spectrometer with 300 W Al K $\alpha$  radiation.

### 1.4 Electrochemical measurements

Electrochemical tests were conducted in a three-electrode cell system. The working electrode is glassy carbon electrode (GCE, diameter: 5.0 mm), the counter electrode is platinum wire, and reference electrode is saturated calomel electrode (SCE). To prepare the catalyst-coated working electrode, the catalyst was dispersed in a mixture containing isopropanol and Nafion (5%) to form a 0.40 mg<sub>Pt</sub>/mL dispersion. Subsequently, the electrochemical active surface area (ECSA) of those catalysts is relative to surface active sites and could be measured by cyclic voltammetry (CV) in 0.1 M HClO<sub>4</sub> solution with the scanning rate of 50 mV s<sup>-1</sup>. EOR and MOR tests were operated in 0.1 M HClO<sub>4</sub> + 0.5 M ethanol and 0.1 M HClO<sub>4</sub> + 0.5 M methanol solution, respectively. For durability tests, Chronoamperometry (CA) measurements and successive CVs for 1000 cycles of as-prepared catalysts were also conducted. All the electrochemical tests were conducted by electrochemical work station (CHI760E) produced by Chen Hua Instrumental Co., Ltd (Shanghai, China).

## 2. Supporting Figure and Tables

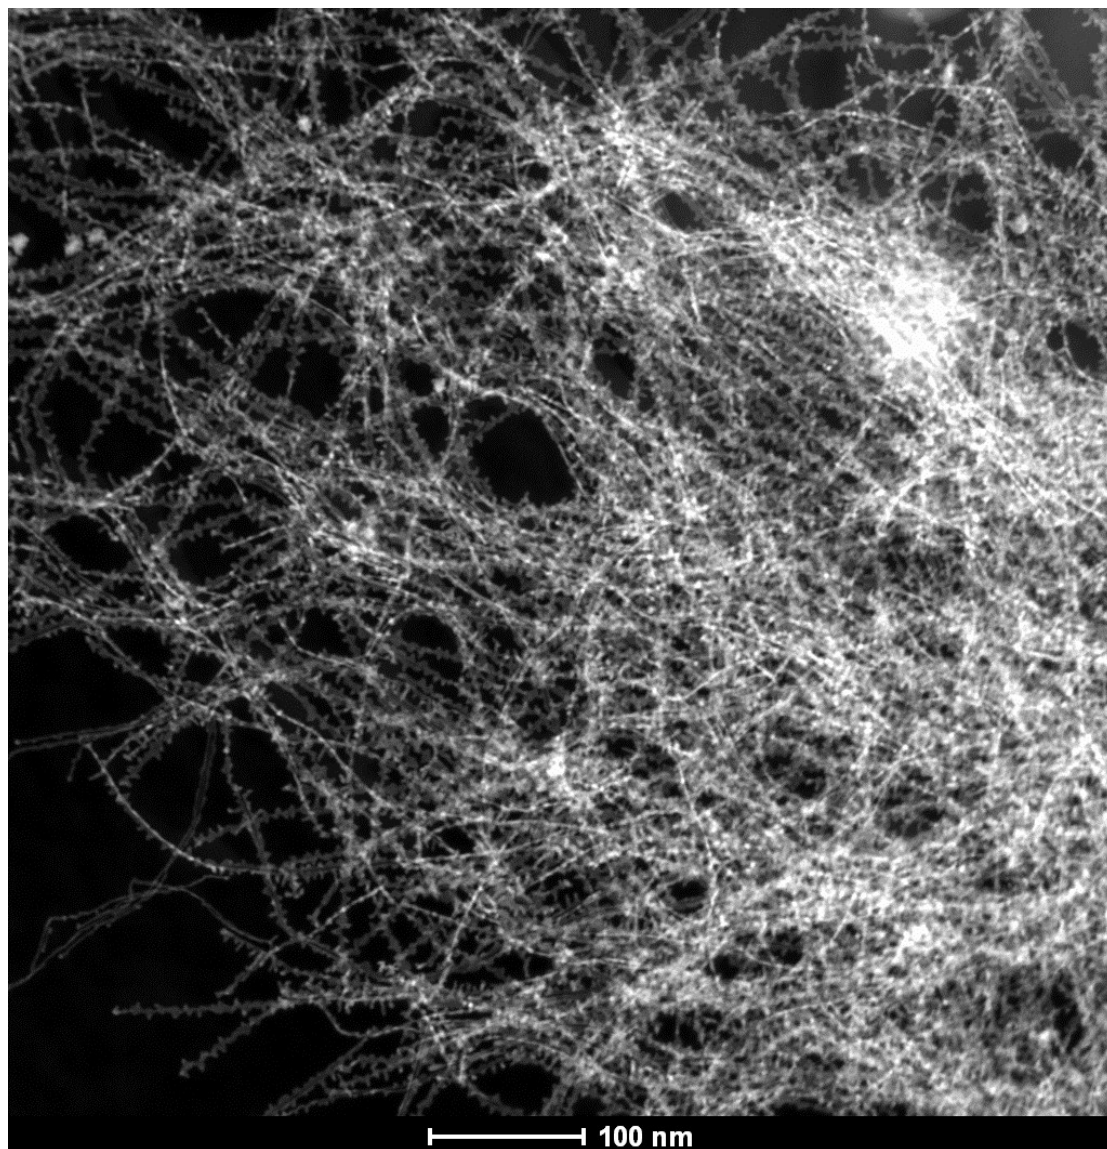

**Fig. S1** Additional HAADF-STEM image of Pt<sub>3</sub>Fe NWs.

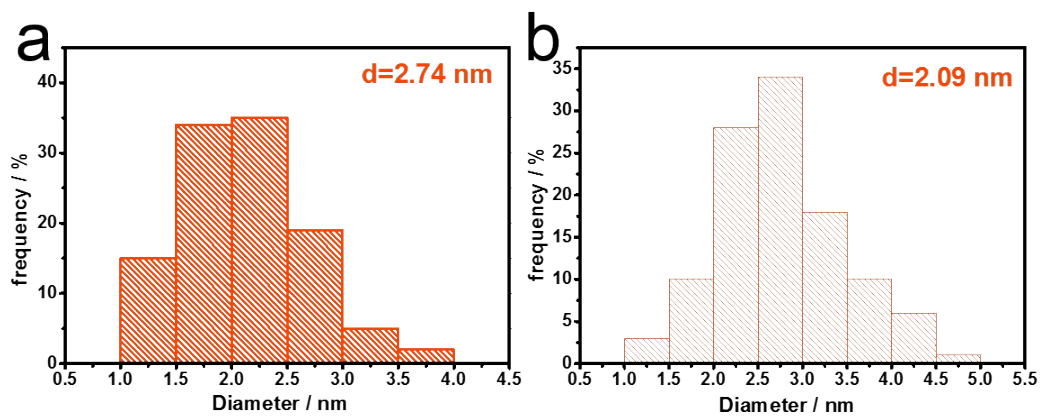

**Fig. S2** Size distribution of the diameter of (a) NWs and (b) exterior branches in Pt<sub>3</sub>Fe NWs.

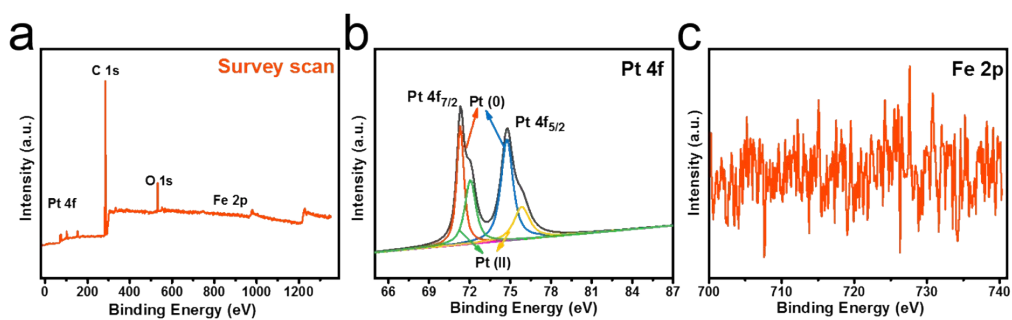

**Fig. S3** XPS spectra of (a) survey scan, (b) Pt 4f, (c) Fe 2p in Pt<sub>3</sub>Fe NWs.

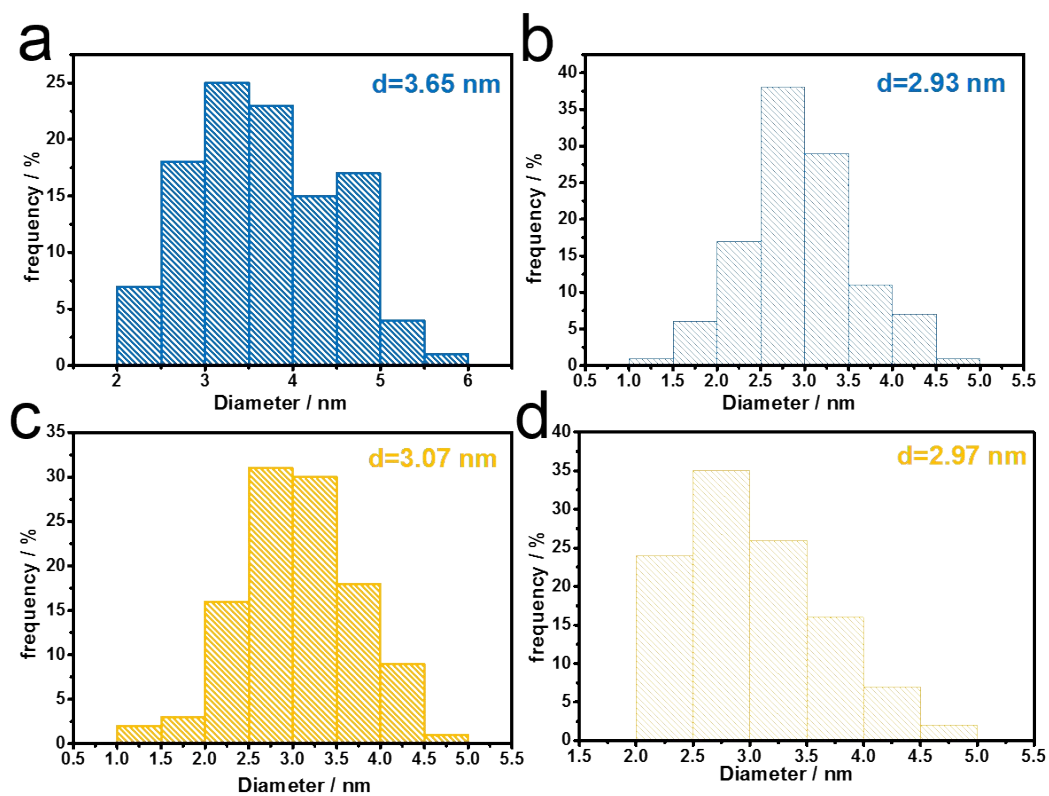

**Fig. S4** Size distribution of (a) NWs and (b) exterior branches in Pt<sub>2</sub>Fe NWs, (c) NWs and (d) exterior branches in Pt<sub>4</sub>Fe NWs.

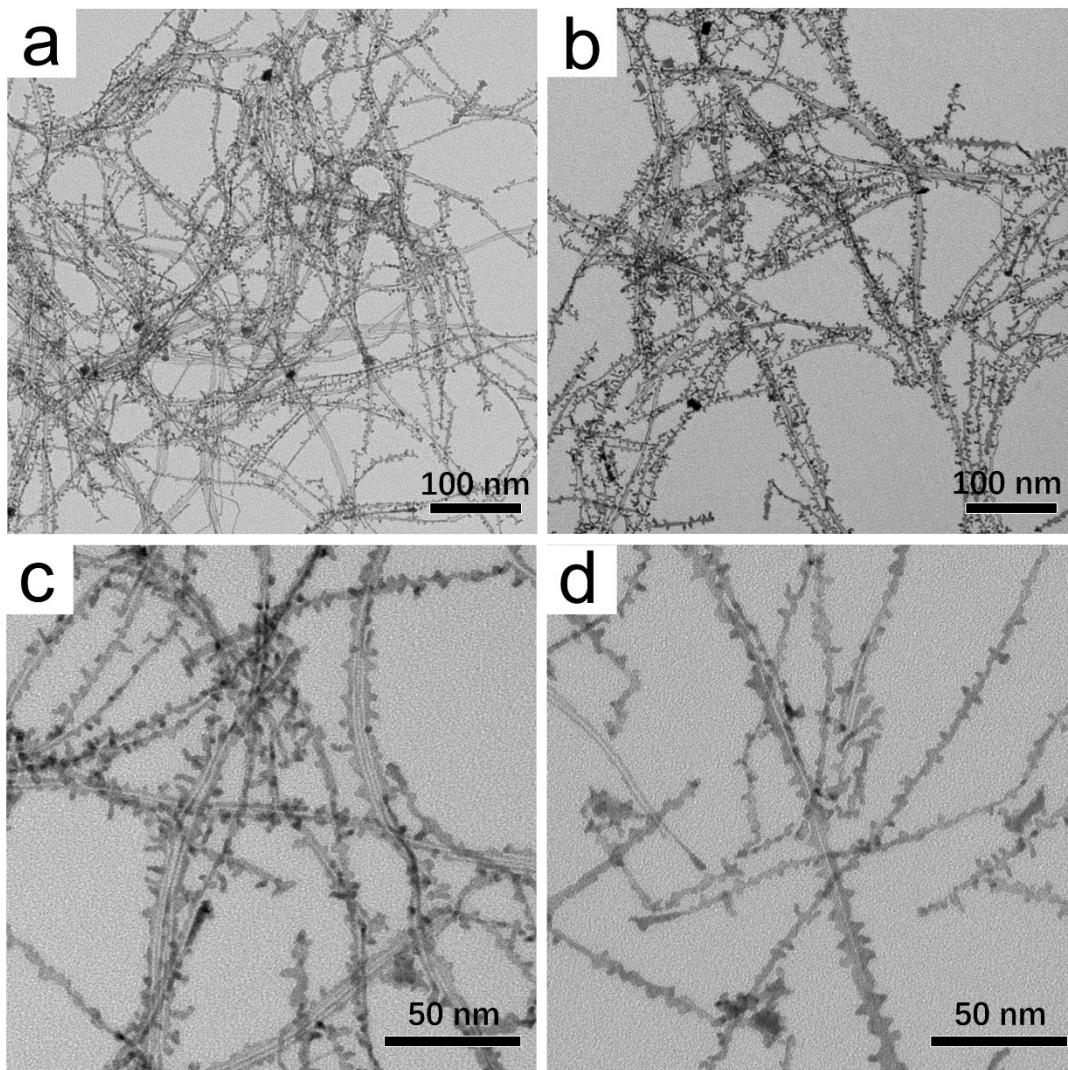

**Fig. S5** Additional TEM images of (a, c)  $\text{Pt}_2\text{Fe}$  NWs and (b, d)  $\text{Pt}_4\text{Fe}$  NWs.

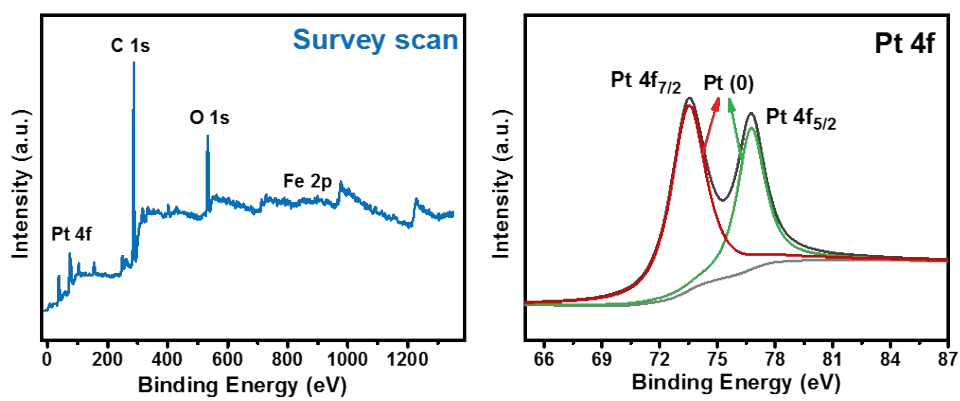

**Fig. S6** XPS spectra of (a) survey scan, (b) Pt 4f in  $\text{Pt}_2\text{Fe}$  NWs.

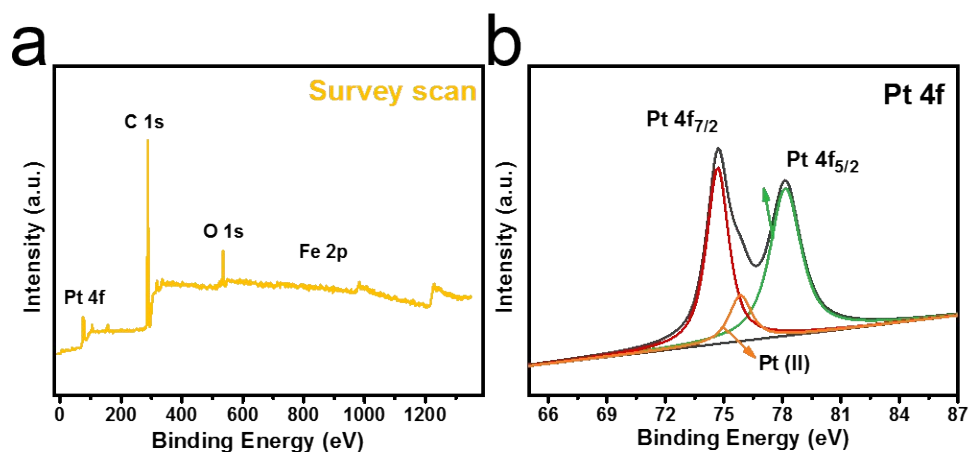

**Fig. S7** XPS spectra of (a) survey scan, (b) Pt 4f in Pt<sub>4</sub>Fe NWs.

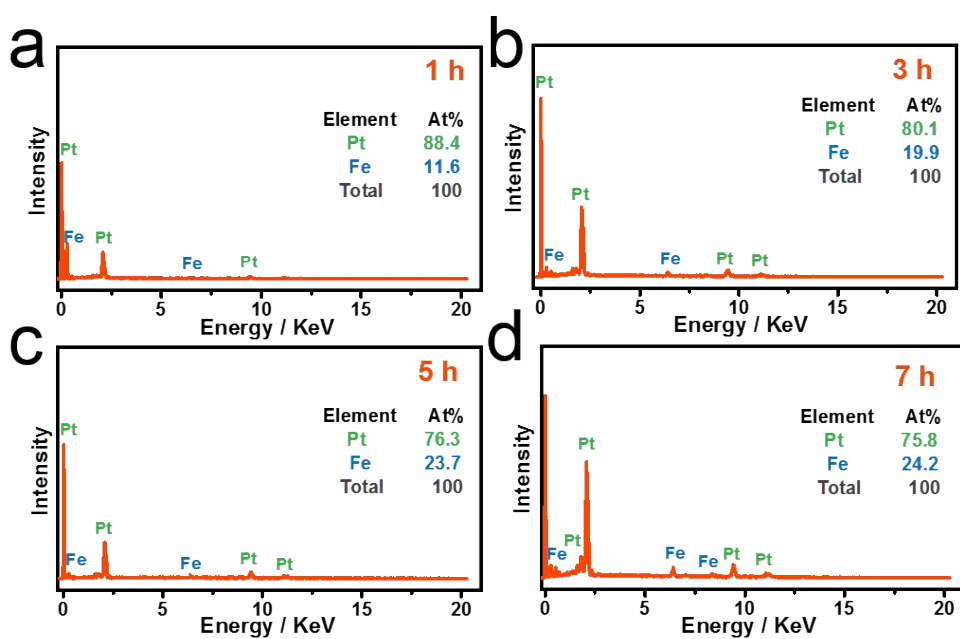

**Fig. S8** SEM-EDS spectrum of Pt<sub>3</sub>Fe NWs intermediates obtained after the reaction have been processed for (a) 1 h, (b) 3 h, (c) 5 h, and (d) 7h while keeping other conditions same.

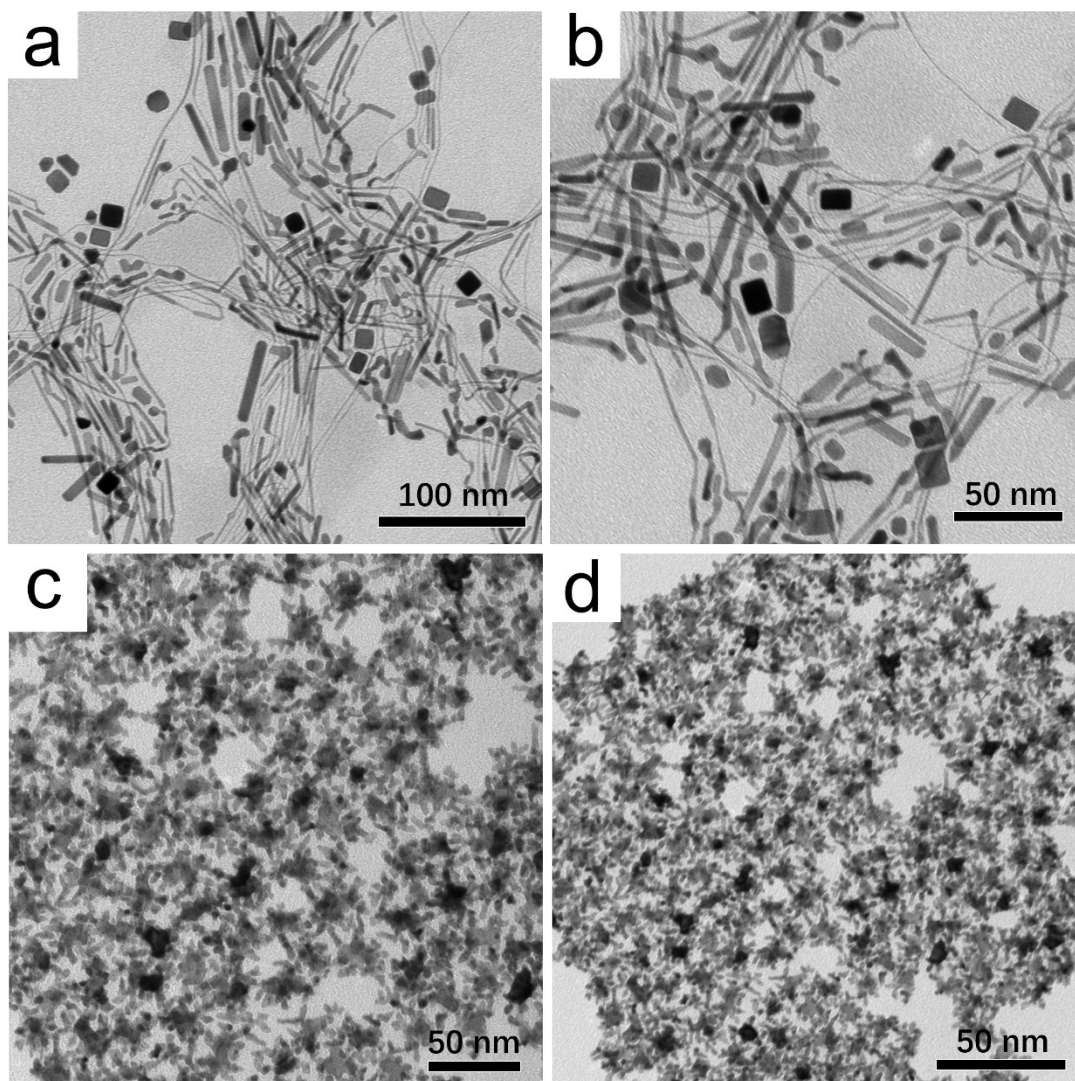

**Fig. S9** TEM images of the products with the same reaction conditions as that of  $\text{Pt}_3\text{Fe}$  NWs without the addition of (a and b)  $\text{Fe}(\text{Ac})_2$ , (c and d) CTAC.



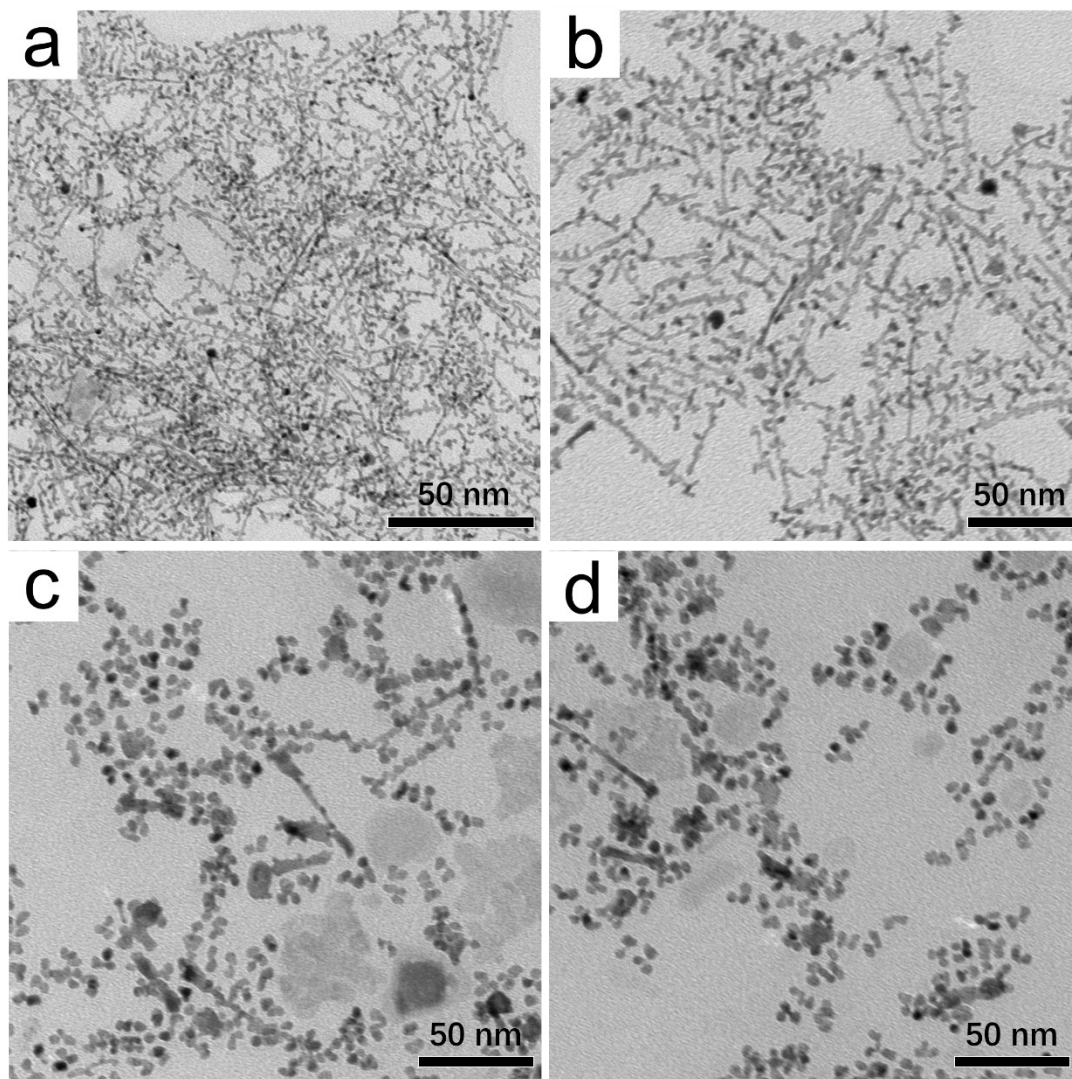

**Fig. S10** TEM images of the products with the same reaction conditions as that of Pt<sub>3</sub>Fe NWs without the addition of (a and b) phloroglucinol, (c and d) W(CO)<sub>6</sub>.

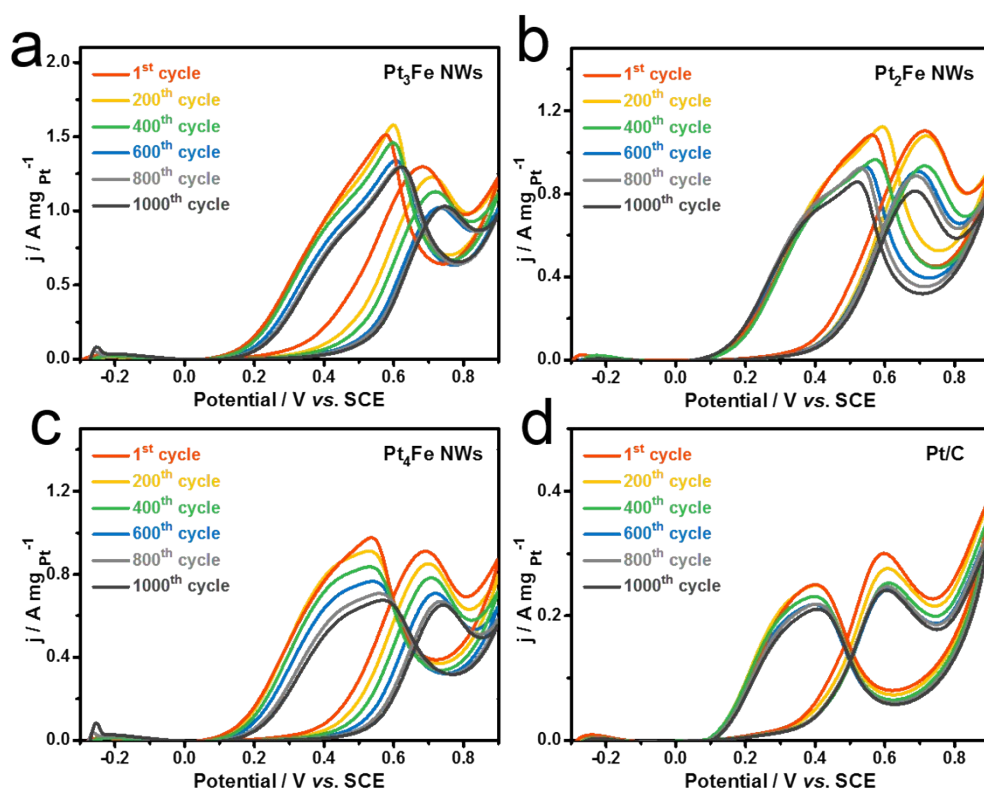

**Fig. S11** CV (1<sup>st</sup>, 200<sup>th</sup>, 400<sup>th</sup>, 600<sup>th</sup>, 800<sup>th</sup> and 1000<sup>th</sup>) curves of (a) Pt<sub>3</sub>Fe NWs, (b) Pt<sub>2</sub>Fe NWs, (c) Pt<sub>4</sub>Fe NWs, (d) Pt/C catalysts recorded in 0.1 M HClO<sub>4</sub>+ 0.5 M ethanol solution.

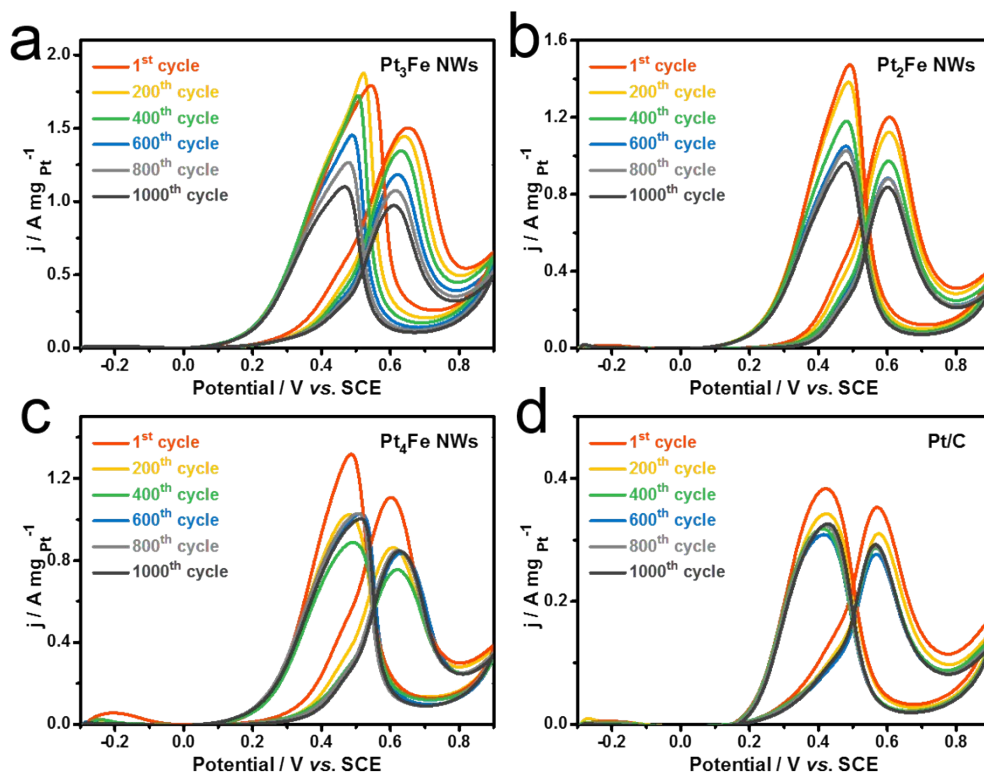

**Fig. S12** CV (1<sup>st</sup>, 200<sup>th</sup>, 400<sup>th</sup>, 600<sup>th</sup>, 800<sup>th</sup> and 1000<sup>th</sup>) curves of (a)  $\text{Pt}_3\text{Fe}$  NWs, (b)  $\text{Pt}_2\text{Fe}$  NWs, (c)  $\text{Pt}_4\text{Fe}$  NWs, (d) Pt/C catalysts recorded in 0.1 M  $\text{HClO}_4$  + 0.5 M methanol solution.

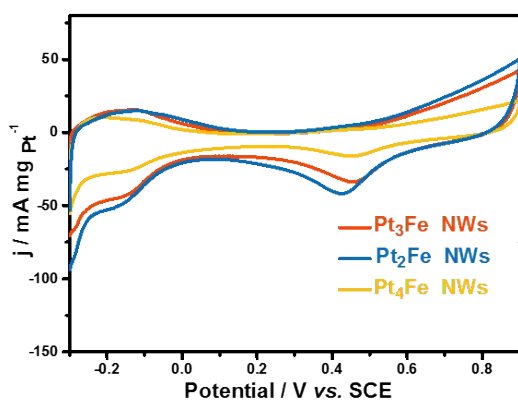

**Fig. S13** CV curves of  $\text{Pt}_3\text{Fe}$  NWs,  $\text{Pt}_2\text{Fe}$  NWs, and  $\text{Pt}_4\text{Fe}$  NWs catalysts recorded in 0.1 M  $\text{HClO}_4$  solution after durability tests.

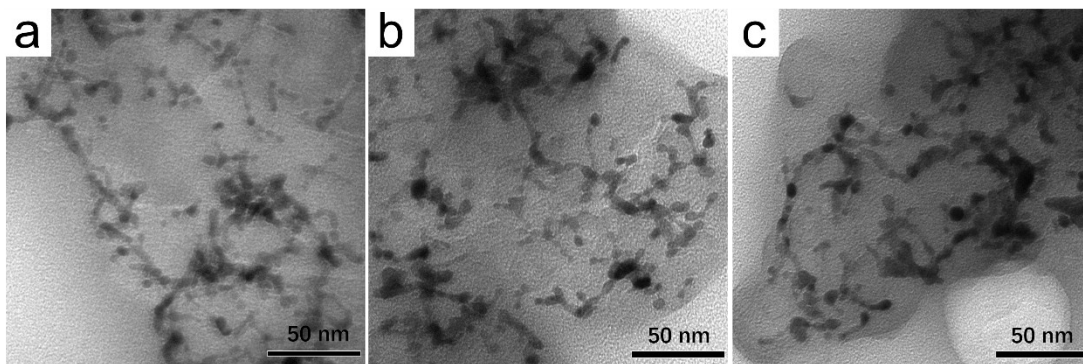

**Fig. S14** The representative TEM images of (a) Pt<sub>3</sub>Fe NWs, (b) Pt<sub>2</sub>Fe NWs, (c) Pt<sub>4</sub>Fe NWs after durability tests.

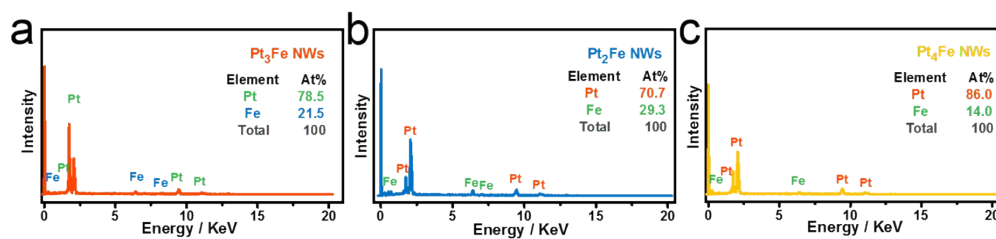

**Fig. S15** SEM-EDS spectrum of (a) Pt<sub>3</sub>Fe NWs, (b) Pt<sub>2</sub>Fe NWs, (c) Pt<sub>4</sub>Fe NWs catalysts after electrochemical durability test.

**Table S1.** EOR performances of Pt<sub>3</sub>Fe NWs and various electrocatalysts from published works.

| Catalysts                | Peak currents from CV curves         |                                       | Electrolyte                                             | Reference                                                    |
|--------------------------|--------------------------------------|---------------------------------------|---------------------------------------------------------|--------------------------------------------------------------|
|                          | J <sub>m</sub> (A mg <sup>-1</sup> ) | J <sub>s</sub> (mA cm <sup>-2</sup> ) |                                                         |                                                              |
| Pt <sub>3</sub> Fe NWs   | 1.30                                 | 4.01                                  | 0.1 M HClO <sub>4</sub> +<br>0.5 M Ethanol              | This work                                                    |
| Pt-Cu<br>Nanocone        | ~ 0.4                                | 2.97                                  | 0.5 M H <sub>2</sub> SO <sub>4</sub> +<br>0.1 M Ethanol | <i>J. Am. Chem. Soc.</i> <b>2013</b> , 135, 18304-18307.     |
| THH PtNi<br>NFs          | 0.77                                 | 1.99                                  | 0.5 M H <sub>2</sub> SO <sub>4</sub> +<br>0.1 M Ethanol | <i>Nano Lett.</i> <b>2016</b> , 16, 2762-2767.               |
| RDH PtNi<br>NFs          | 0.98                                 | 1.79                                  |                                                         |                                                              |
| PtRhNi/C                 | 0.378                                |                                       | 0.5 M HClO <sub>4</sub> + 1<br>M Ethanol                | <i>ChemElectroChem</i> <b>2015</b> , 2, 903-908              |
| PtPb <sub>0.27</sub> NWs | ~ 1.7                                | ~ 0.9                                 | 0.1 M HClO <sub>4</sub> +<br>0.15 M Ethanol             | <i>Chem. Mater.</i> <b>2016</b> , 28, 4447-4452.             |
| PtCu <sub>2.1</sub> NWs  | 1.015                                | 2.16                                  | 0.1 M HClO <sub>4</sub> +<br>0.2 M Ethanol              | <i>Nano Lett.</i> <b>2016</b> , 16, 5037–5043                |
| RuNi@PtRu/<br>SWCNT      | 0.9534                               |                                       | 0.5 M H <sub>2</sub> SO <sub>4</sub> +<br>1 M Ethanol   | <i>Energy Environ. Sci.</i> <b>2011</b> , 4, 4513-4516.      |
| PtRh<br>NW/GNS           | 1                                    | 2.8                                   | 1 M H <sub>2</sub> SO <sub>4</sub> + 1<br>M Ethanol     | <i>ACS Appl. Mater. Interface</i> <b>2017</b> , 9, 3535-3543 |

**Table S2.** MOR performances of Pt<sub>3</sub>Fe NWs and various electrocatalysts from published works.

| Catalysts                                              | Peak currents from CV curves         |                                       | Electrolyte                                         | Reference                                                   |
|--------------------------------------------------------|--------------------------------------|---------------------------------------|-----------------------------------------------------|-------------------------------------------------------------|
|                                                        | J <sub>m</sub> (A mg <sup>-1</sup> ) | J <sub>s</sub> (mA cm <sup>-2</sup> ) |                                                     |                                                             |
| Pt <sub>3</sub> Fe NWs                                 | 1.50                                 | 4.65                                  | 0.1 M HClO <sub>4</sub> + 1 M methanol              | This work                                                   |
| Pt <sub>3</sub> Cu Nanoicosahedra                      | 0.736                                | 2.14                                  | 0.1 M HClO <sub>4</sub> + 0.2 M methanol            | <i>ACS Nano</i> , <b>2015</b> , 9, 7634-7640                |
| Pt <sub>3</sub> Cu Nanooctahedra                       | 0.518                                | 1.63                                  |                                                     |                                                             |
| PtFe NWs                                               |                                      | 1.20                                  | 0.5 M H <sub>2</sub> SO <sub>4</sub> + 1 M Methanol | <i>Chem. Eur. J.</i> <b>2013</b> , 19, 233-239.             |
| PtNi Concave Nanooctahedra                             | 0.44                                 | 1.55                                  | 0.1 M HClO <sub>4</sub> and 1 M Methanol            | <i>Angew. Chem. Int. Ed.</i> <b>2012</b> , 51, 12524-12528. |
| Fe <sub>28</sub> Pt <sub>38</sub> Pd <sub>34</sub> NWs | 0.4887                               |                                       | 0.1M HClO <sub>4</sub> + 0.2 M Methanol             | <i>J. Am. Chem. Soc.</i> <b>2012</b> , 51, 15354-15357.     |
| Pt <sub>7</sub> Ru <sub>2</sub> Fe NWs                 |                                      | 2.27                                  | 0.1 M HClO <sub>4</sub> + 0.5 M Methanol            | <i>Energy Environ. Sci.</i> <b>2015</b> , 8, 350-363.       |
| PtPb CNCs                                              | 0.97                                 | 2.09                                  | 0.1 M HClO <sub>4</sub> +0.5 M Methanol             | <i>Chem. Mater.</i> <b>2017</b> , 29, 4557-4562             |
